# Supplementary material
Source: MDPI journal article supplement (https://www.mdpi.com/2673-401X/1/1/2)
Supplement: s1 [file s1]

# Understanding the Reactivity of Trimethylsilyldiazoalkanes Participating in [3+2] Cycloaddition Reactions towards Diethylfumarate with a Molecular Electron Density Theory Perspective

Luis R. Domingo <sup>1,\*</sup>, Nivedita Acharjee <sup>2,\*</sup> and Haydar A Mohammad-Salim <sup>3</sup>

<sup>1</sup> Department of Organic Chemistry, University of Valencia, Dr. Moliner 50, Burjassot, E-46100 Valencia, Spain

<sup>2</sup> Department of Chemistry, Durgapur Government College, Durgapur-713214, West Bengal, India

<sup>3</sup> Department of Chemistry, University of Zakho, Duhok 42001, Iraq; hayder.salim@uoz.edu.krd

\* Correspondence: domingo@utopia.uv.es (L.R.D.); nivchem@gmail.com (N.A.); Tel.: +0-947-415-0273 (N.A.)

---

## Index

**S2** 1. BET study of the 32CA reaction of TSDE 1 with DFM 4.

**S4** 2. BET study of the 32CA reaction of TSDA 3 with DFM 4.

**S6** References.

**S7** Table with the MPWB1K/6-311G(d,p) calculated gas phase total energies, enthalpies, and Gibbs free energies, computed at 298 K, of the stationary points involved in the 32CA reactions of TSDE 1, TSDP 2 and TSDA 3, with DFM 4.

**S8** Table with the MPWB1K/6-311G(d,p) calculated total energies, enthalpies, and Gibbs free energies, computed at 298 K in carbon tetrachloride, of the stationary points involved in the 32CA reactions of TSDE 1, TSDP 2 and TSDA 3, with DFM 4.

### 1. BET study of the 32CA reaction of TSDE 1 with DFM 4

The Bonding Evolution Theory<sup>1</sup> (BET), which comes from the conjunction of the electron localization function<sup>2,3</sup> (ELF) topological analysis and the Thom's Catastrophe theory,<sup>4</sup> has proven to be a very useful methodological tool to establish the nature of the electronic rearrangement taking place along the reaction path.<sup>5</sup> Herein, the BET of the 32CA reaction of TSDE 1 with DFM 4 is first studied. The populations of the most significant valence basins, among other relevant parameters, are given in Table S1.

The 32CA reaction of TSDE 1 with DFM 4 takes place along nine different phases (see Table S1). *Phase I* begins at the structure **S1-I**,  $d_{N1-C5} = 2.55 \text{ \AA}$  and  $d_{C3-C4} = 2.60 \text{ \AA}$ , which is the starting structure of the IRC of this 32CA reaction. ELF of **S1-I** is very similar to that of the separated reagents (see Section 3.1). The only difference being in the total integrating population of the  $V(N1,N2)$  and  $V'(N1,N2)$  disynaptic basins, 3.69 e in TSDE 1 and 3.61 e in **S1-I**, while the population of the  $V(C3,N2)$  disynaptic basin in TSDE 1 and **S1-I** are 3.07 e and 3.28 e, respectively, suggesting the changes in electronic distribution of the N1-N2-C3 moiety with the change in geometry from TSDE 1 to the starting IRC point **S1-I**. Note that **S1-I** shows a GEDT of 0.16 e, fluxing from the trimethylsilyldiazoalkane framework to the DFM one, owing to the strong nucleophilic character of TSDE 1 and strong electrophilic character of DFM 4. (see Section 3.2).

*Phase II* starts at the structure **S2-I**,  $d_{N1-C5} = 2.43 \text{ \AA}$  and  $d_{C3-C4} = 2.47 \text{ \AA}$ , with an energy cost (EC) of 2.4 kcal·mol<sup>-1</sup> and a GEDT of 0.20 e. At **S2-I**, the two  $V(C4,C5)$  and  $V'(C4,C5)$  disynaptic basins have merged into one  $V(C4,C5)$  disynaptic basin integrating at 3.19 e, suggesting an EC of 2.4 kcal·mol<sup>-1</sup> for the rupture of C4-C5 double bond of DFM 4 along the reaction path.

*Phase III* starts at the structure **S3-I**,  $d_{N1-C5} = 2.30 \text{ \AA}$  and  $d_{C3-C4} = 2.32 \text{ \AA}$ , with an EC of 5.8 kcal·mol<sup>-1</sup> and a GEDT of 0.24 e. **S3-I** is associated with the formation of a new  $V(N2)$  monosynaptic basin, integrating 1.22 e. The electron density demanded for the formation of this monosynaptic basin comes from the C3-N2 bonding region, which has been depopulated by 1.00 e, and also from the N1-N2 bonding region, which has experienced a depopulation of 0.18 e. This  $V(N2)$  monosynaptic basin, which is associated with the lone pair present at the N2 nitrogen, experiences a continuous increase of its population until reach 2.65 e at pyrazole 6 at the end of the IRC.

*Phase IV* starts at the structure **S4-I**,  $d_{N1-C5} = 2.26 \text{ \AA}$  and  $d_{C3-C4} = 2.27 \text{ \AA}$ , with an EC of 6.7 kcal·mol<sup>-1</sup>. **S4-I** is characterized by the formation of a new  $V(C3)$  monosynaptic basin integrating 0.54 e. The electron density demanded for the formation of this monosynaptic basin comes from the depopulation of the C3-N2 bonding region, which has been depopulated by 0.19 e. **S4-I** shows a GEDT value of 0.25 e.

*Phase V* starts at the structure **S5-I**,  $d_{N1-C5} = 2.18 \text{ \AA}$  and  $d_{C3-C4} = 2.17 \text{ \AA}$ , with an EC of 7.6 kcal·mol<sup>-1</sup>. **S5-I** is characterized by the formation of a new  $V(C4)$  monosynaptic basin, integrating 0.18 e, which is formed by deriving electron density from the C4-C5 bonding region, which experiences a depopulation of 0.17 e. **TS2** belongs to Phase IV. This suggests that the activation energy of this 32CA reaction is mainly associated with the EC demanded for the formation of the *pseudoradical*<sup>6</sup> C3 and C4 carbons at the interacting nuclei, and for the formation of the non-bonding electron density at the N2 nitrogen, which demand the depopulation of the N2-C3 and C4-C5 bonding regions. **S5-I** shows a GEDT value of 0.26 e, suggesting a polar reaction.

*Phase VI* starts at the structure **S6-I**,  $d_{N1-C5} = 2.09 \text{ \AA}$  and  $d_{C3-C4} = 2.06 \text{ \AA}$ , which is characterized by the formation of a new  $V(C5)$  monosynaptic basin, integrating 0.19 e. The electron density demanded for the creation of this monosynaptic basin comes from the depopulation of the C4-C5 bonding region that has been depopulated by 0.32 e. At **S6-I** the populations of the  $V(C3)$  and  $V(C4)$  monosynaptic basins have been increased by 0.70 and 0.36 e, respectively.

*Phase VII* starts at the structure **S7-I**,  $d_{N1-C5} = 2.01 \text{ \AA}$  and  $d_{C3-C4} = 1.96 \text{ \AA}$ . At the beginning of this phase, the first more relevant change along the IRC takes place. At this structure, while the  $V(C4)$  and  $V(C3)$  monosynaptic basin present at **S6-I** are missing, a new  $V(C3,C4)$  disynaptic basin, integrating 1.26 e, is created. These topological changes indicate that the formation of the first C3-C4 single bond takes place at a C3-C4 distance of 1.96 Å by the C-to-C coupling of the two *pseudoradical* C3 and C4 carbons.<sup>7</sup>

Phase VIII starts at the structure **S8-I**,  $d_{N1-C5} = 1.92 \text{ \AA}$  and  $d_{C3-C4} = 1.86 \text{ \AA}$ , which is characterized by the splitting of the V(N1) monosynaptic basin into two monosynaptic basins V(N1) and V'(N1), respectively integrating 3.11 e and 0.52 e.

Finally, the last *Phase IX* starts at the structure **S9-I**,  $d_{N1-C5} = 1.77 \text{ \AA}$  and  $d_{C3-C4} = 1.73 \text{ \AA}$  and ends at pyrazole **6**. At **S9-I**, the second more relevant change along the IRC takes place. At this structure, while the V(C5) and V'(N1) monosynaptic basins are missing, a new V(N1,C5) disynaptic basin, integrating 1.32, is created. These relevant topological changes indicate that the formation of the second N1-C5 single bond has begun at a C-N distance of 1.77 Å through the C-to-N coupling of the electron density of the *pseudoradical* C5 carbon present at **S8-I** and part of the non-bonding electron density of the N1 nitrogen. Along this last phase, the molecular electron density is relaxed to reach the structure of pyrazole **6**, in which the V(C3,C4) and V(N1,C5) disynaptic basins reach a population of 1.84 and 1.75 e, respectively (see Table S1).

**Table 1.** ELF valence basin populations, distances of the forming bonds, and relative<sup>a</sup> electronic energies of the IRC structures **S1-I** – **S9-I** defining the nine phases characterizing the molecular mechanism of the 32CA reaction of TSDE **1** and DFM **4**. Distances are given in angstroms, Å, and relative energies in kcal·mol<sup>-1</sup>.

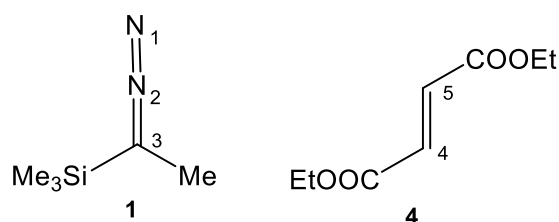[illegible]

## 2. BET study of the 32CA reaction of TSDA 3 with DFM 4

Herein, the BET of the 32CA reaction of TSDA 3 with DFM 4 is studied. The populations of the most significant valence basins, among other relevant parameters, are given in Table S2.

The 32CA reaction of TSDA 3 with DFM 4 takes place along nine different phases (see Table S1). *Phase I* begins at the structure **S1-II**,  $d_{N1-C5} = 2.71 \text{ \AA}$  and  $d_{C3-C4} = 2.74 \text{ \AA}$ , which is the starting structure of the IRC of this 32CA reaction. ELF of **S1-II** is very similar to that of the separated reagents (see Section 3.1). The only difference being in the total integrating population of the  $V(N1,N2)$  and  $V'(N1,N2)$  disynaptic basins, 3.86 e at TSDA 3 and 3.81 e at **S1-II**, while the population of the  $V(C3,N2)$  disynaptic basin is 2.93 e and 3.04 e at TSDA 3 and **S1-II**, respectively, suggesting the changes in electronic distribution of the  $N1-N2-C3$  moiety with the in geometry at the starting IRC point **S1-II**. Note that **S1-II** shows a GEDT of 0.08 e, fluxing from the trimethylsilyldiazoalkane framework to the DFM one, which is less than that at **S1-I** (see Table S1), as a consequence of the moderate nucleophilic character of TSDA 3 (see Section 3.2.)

*Phase II* starts at the structure **S2-II**,  $d_{N1-C5} = 2.36 \text{ \AA}$  and  $d_{C3-C4} = 2.38 \text{ \AA}$ , with an EC of 9.4 kcal·mol<sup>-1</sup> and GEDT of 0.17 e. At **S2-II**, the two  $V(C4,C5)$  and  $V'(C4,C5)$  disynaptic basins have merged into one  $V(C4,C5)$  disynaptic basin, integrating at 3.17 e, suggesting an EC of 9.4 kcal·mol<sup>-1</sup> for the rupture of  $C4-C5$  double bond of DFM 4 along the reaction path. Note that the EC for the rupture of  $C4-C5$  bond of DFM 4 is 2.4 kcal mol<sup>-1</sup> for 32CA reaction with TSDE 1, while the EC is 9.4 kcal mol<sup>-1</sup> for 32CA reaction with 3, which suggests that increase in GEDT causes less EC demand, resulting in the easy rupture of the  $C-C$  double bond.<sup>8</sup>

*Phase III* starts at the structure **S3-II**,  $d_{N1-C5} = 2.22 \text{ \AA}$  and  $d_{C3-C4} = 2.22 \text{ \AA}$ , with an EC of 14.2 kcal·mol<sup>-1</sup> and GEDT of 0.19 e. **S3-II** is associated with the formation of a new  $V(N2)$  monosynaptic basin, integrating at 1.52 e. The electron density demanded for formation of this monosynaptic basin comes from of the  $C3-N2$  bonding region, which has been depopulated by 1.20 e, and also from the  $N1-N2$  bonding region, which has experienced depopulation of 0.27 e. This  $V(N2)$  monosynaptic basin, which is associated with the lone pair present at the  $N2$  nitrogen, experiences a continuous increase of its population until reach 2.65 e at pyrazole 10 at the end of the IRC.

*Phase IV* starts at the structure **S4-II**,  $d_{N1-C5} = 2.17 \text{ \AA}$  and  $d_{C3-C4} = 2.16 \text{ \AA}$ , with an EC of 15.2 kcal·mol<sup>-1</sup>. **S4-II** is characterized by the formation of a new  $V(C3)$  monosynaptic basin integrating 0.55 e. The electron density demanded for the formation of this monosynaptic basin comes from the depopulation of the  $C3-N2$  bonding region, which has been depopulated by 0.09 e. **S4-I** shows a GEDT value of 0.19 e.

*Phase V* starts at the structure **S5-II**,  $d_{N1-C5} = 2.13 \text{ \AA}$  and  $d_{C3-C4} = 2.11 \text{ \AA}$ , with an EC of 15.5 kcal·mol<sup>-1</sup>. **S5-II** is characterized by the formation of a new  $V(C4)$  monosynaptic basin, integrating 0.20 e, which is formed by deriving electron density from the  $C4-C5$  bonding region, which experiences a depopulation of 0.19 e. **TS6** belongs to Phase IV. This suggests that the activation energy of this 32CA reaction is mainly associated with the EC demanded for the formation of the pseudoradical<sup>6</sup>  $C3$  and  $C4$  carbons at the interacting nuclei, and for the formation of the non-bonding electron density at the  $N2$  nitrogen, which demands the previous depopulation of the  $C3-N2$  and  $C4-C5$  bonding regions. **S5-I** shows a GEDT value of 0.19 e, suggesting a less polar reaction compared to the 32CA reaction of TSDE 1 with DFM 4 (see Table S1).

*Phase VI* starts at the structure **S6-II**,  $d_{N1-C5} = 2.08 \text{ \AA}$  and  $d_{C3-C4} = 2.06 \text{ \AA}$ , which is characterized by the formation of a new  $V(C5)$  monosynaptic basin, integrating 0.17 e. The electron density demanded for the creation of this monosynaptic basin comes from the depopulation of the  $C4-C5$  bonding region that has been depopulated by 0.23 e. At **S6-II**, the populations of the  $V(C3)$  and  $V(C4)$  monosynaptic basins have been increased by 0.68 and 0.29 e, respectively.

*Phase VII* starts at the structure **S7-II**,  $d_{N1-C5} = 2.03 \text{ \AA}$  and  $d_{C3-C4} = 2.00 \text{ \AA}$ . At the beginning of this phase the first more relevant change along the IRC takes place. At this structure, while the  $V(C4)$  and  $V(C3)$  monosynaptic basin present at **S6-II** are missing, a new  $V(C3,C4)$  disynaptic basin, integrating 1.10 e, is created. These topological changes indicate that the formation of the first  $C3-$

C4 single bond takes place at a C3-C4 distance of 2.00 Å by the C-to-C coupling of the *pseudoradical* C3 and C4 carbons.<sup>7</sup>

Phase VIII starts at the structure **S8-II**,  $d_{N1-C5} = 1.89 \text{ \AA}$  and  $d_{C3-C4} = 1.84 \text{ \AA}$ , which is characterized by the splitting of the V(N1) monosynaptic basin into two monosynaptic basins, V(N1) and V'(N1), integrating 2.99 e and 0.61 e, respectively.

Finally, the last *Phase IX* starts at the structure **S9-II**,  $d_{N1-C5} = 1.78 \text{ \AA}$  and  $d_{C3-C4} = 1.74 \text{ \AA}$  and ends at pyrazole **10**. At **S9-II**, the second more relevant change along the IRC takes place. At this structure, while the V(C5) and V'(N1) monosynaptic basins are missing, a new V(N1,C5) disynaptic basin, integrating 1.30, is created. These relevant topological changes indicate that the formation of the second N1-C5 single bond has begun at a C-N distance of 1.78  $\text{\AA}$  through the C-to-N coupling of the electron density of the *pseudoradical* C5 carbon present at **S8-II** and part of the non-bonding electron density of the N1 nitrogen. Along this last phase, the molecular electron density is relaxed to reach the structure of pyrazole **10**, in which the V(C3,C4) and V(N1,C5) disynaptic basins reach a population of 1.83 and 1.76 e, respectively (see Table S2).

**Table 2.** ELF valence basin populations, distances of the forming bonds, and relative<sup>a</sup> electronic energies of the IRC structures **S1-II** – **S9-II** defining the nine phases characterizing the molecular mechanism of the 32CA reaction of TSDA **3** and DFM **4**. Distances are given in angstroms, Å, and relative energies in kcal·mol<sup>-1</sup>.

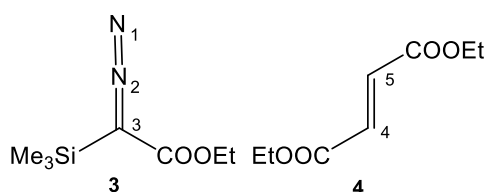[illegible]

## References

1. Krokidis, X.; Noury, S.; Silvi, B. Characterization of elementary chemical processes by Catastrophe Theory. *J. Phys. Chem. A* **1997**, *101*, 7277–7282, doi:10.1021/jp9711508.
2. Becke, A.D.; Edgecombe, K.E. A simple measure of electron localization in atomic and molecular systems. *J. Chem. Phys.* **1990**, *92*, 5397–5403, doi:10.1063/1.458517.
3. Silvi, B.; Savin, A. Classification of chemical bonds based on topological analysis of electron localization functions. *Nature*, **1994**, *371*, 683–686, doi:10.1038/371683a0.
4. (a) Thom, R. *Stabilité Structurelle et Morphogénèse*; Intereditions, Paris, 1972; (b) A. E. R. Woodcock, T. A. Poston in *Geometrical Study of Elementary Catastrophes*; Springer-Verlag, Berlin, 1974.
5. (a) Polo, V.; Andrés, J.; Berski, S.; Domingo, L. R.; Silvi, B. Understanding Reaction Mechanisms in Organic Chemistry from Catastrophe Theory Applied to the Electron Localization Function Topology. *J. Phys. Chem. A* **2008**, *112*, 7128–7136, doi:10.1021/jp801429m. (b) Andrés, J.; González-Navarrete, P.; Safont, V. Unraveling reaction mechanisms by means of Quantum Chemical Topology Analysis. *Int. J. Quantum Chem.* **2014**, *114*, 1239–1252, doi:10.1002/qua.24665. (c) Andrés, J.; Berski, S.; Domingo, L. R.; Polo, V.; Silvi, B. Describing the Molecular Mechanism of Organic Reactions by Using Topological Analysis of Electronic Localization Function. *Curr. Org. Chem.* **2011**, *15*, 3566–3575, doi:10.2174/138527211797636156.
6. (a) Domingo, L.R.; Chamorro, E.; Pérez, P. Understanding the High Reactivity of the Azomethine Ylides in [3 + 2] Cycloaddition Reactions. *Lett. Org. Chem.* **2010**, *7*, 432–439, doi:10.2174/157017810791824900. (b) Domingo, L.R.; Sáez, J. A. Understanding the Electronic Reorganization along the Nonpolar [3 + 2] Cycloaddition Reactions of Carbonyl Ylides. *J. Org. Chem.* **2011**, *76*, 373–379, doi:10.1021/jo101367v.
7. Domingo, L.R. A new C–C bond formation model based on the quantum chemical topology of electron density. *RSC Adv.* **2014**, *4*, 32415–32428, doi:10.1039/C4RA04280H.
8. Domingo, L.R.; Ríos-Gutiérrez, M.; Pérez, P. How does the global electron density transfer diminish activation energies in polar cycloaddition reactions? A Molecular Electron Density Theory study. *Tetrahedron*, **2017**, *73*, 1718–1724, doi:10.1016/j.tet.2017.02.012.

**Table 3.** MPWB1K/6-311G(d,p) calculated gas phase total energies, E, enthalpies, H, and Gibbs free energies, G in a.u, computed at 298K, of the stationary points involved in the 32CA reactions of TSDE 1, TSDP 2 and TSDA 3, with DFM 4.

|            | E             | G            | H            |
|------------|---------------|--------------|--------------|
| <b>1</b>   | -596.675399   | -596.547380  | -596.495537  |
| <b>2</b>   | -788.369446   | -788.190175  | -788.131818  |
| <b>3</b>   | -824.53065    | -824.361063  | -824.301465  |
| <b>4</b>   | -612.839476   | -612.678978  | -612.624071  |
| <b>TS1</b> | -1209.499856  | -1209.181955 | -1209.103068 |
| <b>5</b>   | -1209.566566  | -1209.244156 | -1209.166528 |
| <b>TS2</b> | -1209.502710  | -1209.186709 | -1209.106633 |
| <b>6</b>   | -1209.566281  | -1209.247477 | -1209.166698 |
| <b>TS3</b> | -1401.186568  | -1400.821434 | -1400.732903 |
| <b>7</b>   | -1401.253526  | -1400.882224 | -1400.797095 |
| <b>TS4</b> | -1401.1909130 | -1400.826655 | -1400.738747 |
| <b>8</b>   | -1401.249970  | -1400.878496 | -1400.795056 |
| <b>TS5</b> | -1437.340483  | -1436.985155 | -1436.895283 |
| <b>9</b>   | -1437.402467  | -1437.04474  | -1436.953811 |
| <b>TS6</b> | -1437.345212  | -1436.989932 | -1436.901317 |
| <b>10</b>  | -1437.404242  | -1437.045646 | -1436.956793 |

**Table 4.** MPWB1K/6-311G(d,p) calculated total energies, E, enthalpies, H, and Gibbs free energies, G in a.u., computed at 298 K in carbon tetrachloride, of the stationary points involved in the 32CA reactions of TSDE 1, TSDP 2 and TSDA 3, with DFM 4.

|            | E            | G            | H            |
|------------|--------------|--------------|--------------|
| <b>1</b>   | -596.676758  | -596.549095  | -596.497121  |
| <b>2</b>   | -788.371550  | -788.192339  | -788.13409   |
| <b>3</b>   | -824.532823  | -824.363670  | -824.303954  |
| <b>4</b>   | -612.843051  | -612.683006  | -612.627833  |
| <b>TS1</b> | -1209.504272 | -1209.189376 | -1209.108587 |
| <b>5</b>   | -1209.571556 | -1209.249562 | -1209.171773 |
| <b>TS2</b> | -1209.507631 | -1209.19292  | -1209.112259 |
| <b>6</b>   | -1209.571474 | -1209.253204 | -1209.172217 |
| <b>TS3</b> | -1401.191540 | -1400.82696  | -1400.73848  |
| <b>7</b>   | -1401.258189 | -1400.888044 | -1400.802444 |
| <b>TS4</b> | -1401.196052 | -1400.831071 | -1400.743128 |
| <b>8</b>   | -1401.255517 | -1400.884444 | -1400.801023 |
| <b>TS5</b> | -1437.345050 | -1436.991129 | -1436.900375 |
| <b>9</b>   | -1437.408552 | -1437.051554 | -1436.960381 |
| <b>TS6</b> | -1437.349804 | -1436.996108 | -1436.905429 |
| <b>10</b>  | -1437.410323 | -1437.051978 | -1436.963283 |
